# Supplementary material
Source: publisher figshare collection journal article supplement (https://tandf.figshare.com/ndownloader/files/17946842)
Supplement: Supplementary file 1 [file 17946842]

**Supporting information**

**SUPERSATURATING DRUG DELIVERY SYSTEM OF FIXED DRUG COMBINATION: SULFAMETHOXAZOLE AND TRIMETHOPRIM**

**
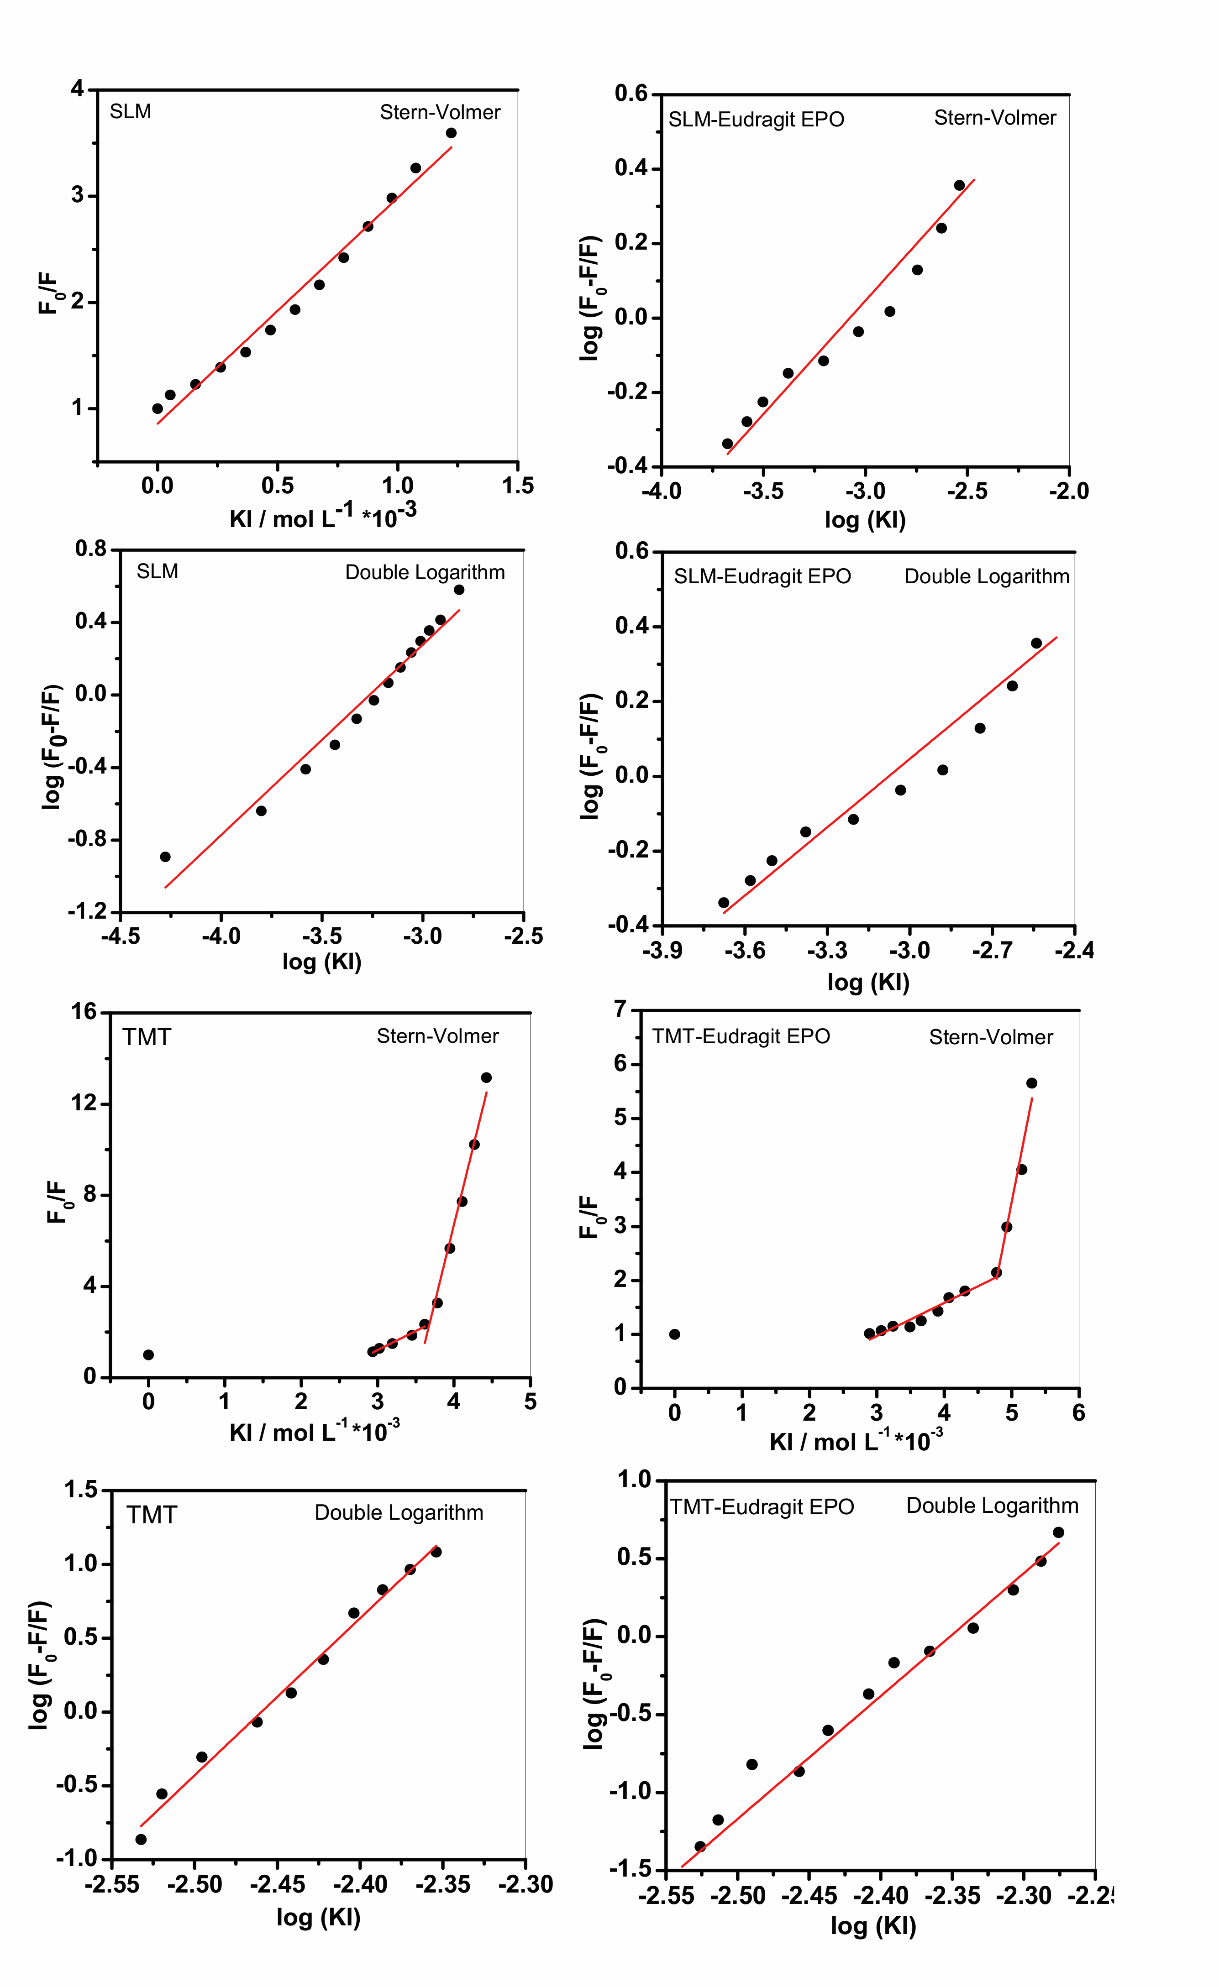
**

**Figure S1.** The Stern-Volmer and double logarithm plots of fluorescence quenching of TMT and SLM in presence and absence of Eudragit EPO in aqueous solution.


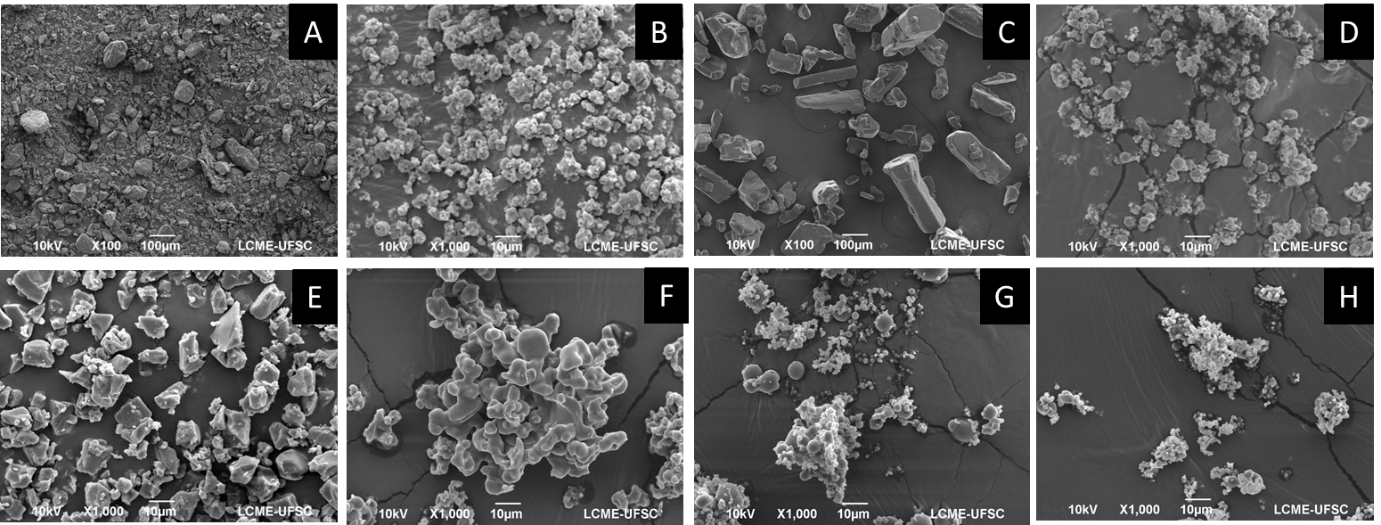


**Figure S2.** Photomicrographs of crystalline SLM (A), amorphous SLM (B), crystalline TMT (C), amorphous TMT (D), Eudragit EPO (E), Ternary solid dispersion 3:7 drugs-Eudragit EPO (F), 5:5 drugs-Eudragit EPO (G), 7:3 drugs-Eudragit EPO (H).
